# Supplementary material for: The Effects of Exercise Training on Glucose Homeostasis and Muscle Metabolism in Type 1 Diabetic Female Mice
Source: MDPI journal article supplement (doi:10.3390/metabo12100948), 2022-10-05
Supplement: s1 [file s1]

**Table S1.** Primer Sequences for Genes Analyzed via RT-PCR.

| Gene         | Gene ID | Primer    | Sequence                 |
|--------------|---------|-----------|--------------------------|
| <i>Acat1</i> | 110446  | Sense     | GGCGCAGGTTTACCTATTT      |
|              |         | AntiSense | GTTGCTCCTCTGCTCATTAC     |
| <i>Akt1</i>  | 11651   | Sense     | GCCTGATCAAGTTCTCCTACTC   |
|              |         | AntiSense | TGCCCACAGTAGAAACATCC     |
| <i>Bdh1</i>  | 71911   | Sense     | GTGACCAACTCTGTACCTTCTC   |
|              |         | AntiSense | CATCTTCACCCAGACCTAACTC   |
| <i>Cd36</i>  | 12491   | Sense     | ACTGGTGGATGGTTTCCTAGCCTT |
|              |         | AntiSense | TTTCTCGCCAACTCCCAGGTACAA |
| <i>Dgat1</i> | 13350   | Sense     | GGCCTTACTGGTTGAGTCTATC   |
|              |         | AntiSense | GTTGACATCCCGGTAGGAATAA   |
| <i>Glut1</i> | 20525   | Sense     | CATCGTGGCCATCTTTGGCTTTGT |
|              |         | AntiSense | GGAAGCACATGCCCACAATGAAGT |
| <i>Glut4</i> | 20528   | Sense     | TCGTGGCCATATTTGGCTTTGTGG |
|              |         | AntiSense | AGGACCCATAGCATCCGCAACATA |
| <i>Irs1</i>  | 16367   | Sense     | TCCCTTTCTCCAGCACTAAC     |
|              |         | AntiSense | CCCTGTAGCCAAGAGGTATAAG   |
| <i>Irs2</i>  | 384783  | Sense     | CTGGATAGAGGACTGAGGAAGA   |
|              |         | AntiSense | TCCTCTGGGTAAGGGTTGTA     |
| <i>Mcad</i>  | 384783  | Sense     | TGGCGATGAAGGTTGAACTCGCTA |
|              |         | AntiSense | GCTGATTGGCAATGTCTCCAGCAA |
| <i>Ppara</i> | 19013   | Sense     | GCGTACGGCAATGGCTTTATCACA |
|              |         | AntiSense | GCAGCCACAAACAGGGAAATGTCA |
| <i>Oxct1</i> | 67041   | Sense     | AGCTTCCTTGCCTTGGTATC     |
|              |         | AntiSense | CATCCACTAAAGCAGTCCTACC   |
